# Supplementary material
Source: Springer Nature journal article supplement (https://www.springermedizin.de/resource/supplementary/12968_2010_977_MOESM2_ESM.pdf/9580082)
Supplement: MOESM2 [file 9580082]

**A****Normal diastolic filling**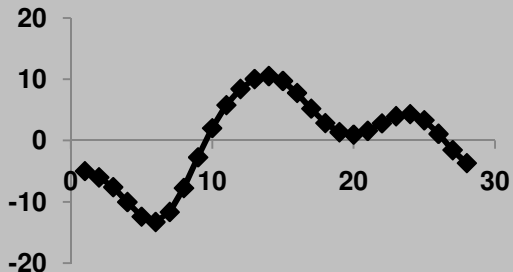

$DVR_{80} = 76\%$   
 $PFR = 255 \text{ ml/sec}$   
 $nPFR = 3.19 \text{ /sec}$

**B****Impaired Relaxation (grade 1)**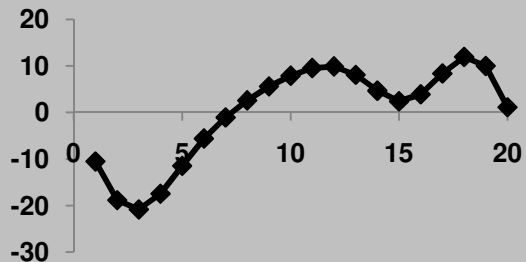

$DVR_{80} = 87\%$   
 $PFR = 279 \text{ ml/sec}$   
 $nPFR = 3.40 \text{ /sec}$

**C****Restrictive Filling (grade 3)**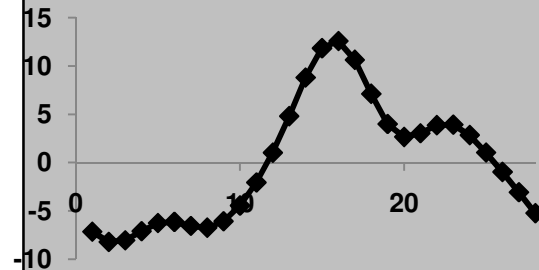

$DVR_{80} = 59\%$   
 $PFR = 553 \text{ ml/sec}$   
 $nPFR = 4.64 \text{ /sec}$
